# Supplementary material
Source: PubMed Central journal article supplement (PMC4056837)
Supplement: ml200195s_si_001.pdf [file ml200195s_si_001.pdf]

There are two types of dose response curve in the Fig.S1

Type1 shows the fluorescence intensity of alamar blue, a viability dye, from compound treated cell culture. Two breast cancer cell lines (MCF10A-derived) were used to create this cell viability curve. X-axis represents compound concentration in nM. The highest concentration is 100nM and each data point represents mean of duplicate data. Cells were treated with compound in 384-well assay plate for 24 hours.

Type 1

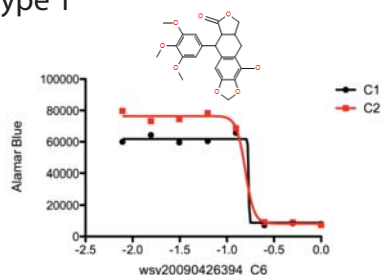

Type2 measures normalized cell viability in two immortalized fibroblast cell lines (BJ-derived). Cells were treated with each compound in 384-well assay plate for 24 hours. The highest concentration of the compound is 100nM and each data point represents mean of duplicate data. Alamar blue dye was used to determine cell viability.

Type 2

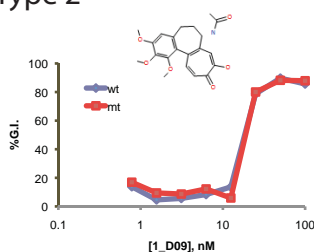

In every dose-response curve, we included the structure and the name of the compound. If the name of the compound is unknown, we indicated PubChem compound ID as a reference.

Group 1: Microtubule inhibitor  
Subgroup a. Podophyllotoxin and its analogs

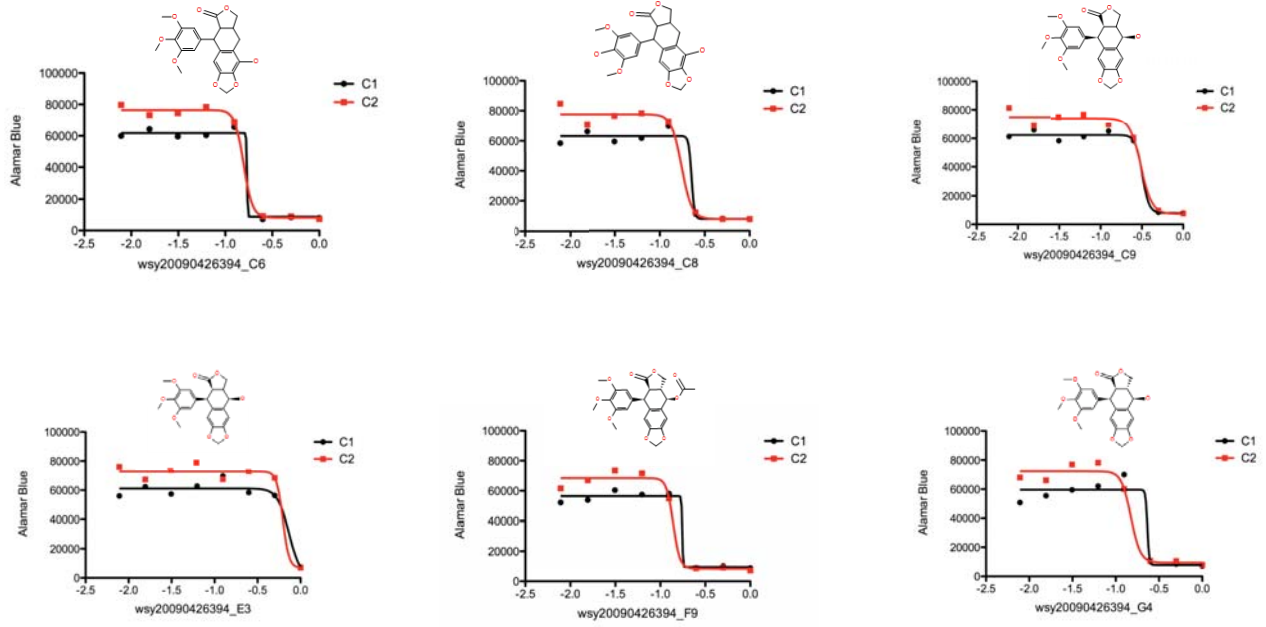

Group 1: Microtubule inhibitor  
Subgroup b. Colchicine and its analogs

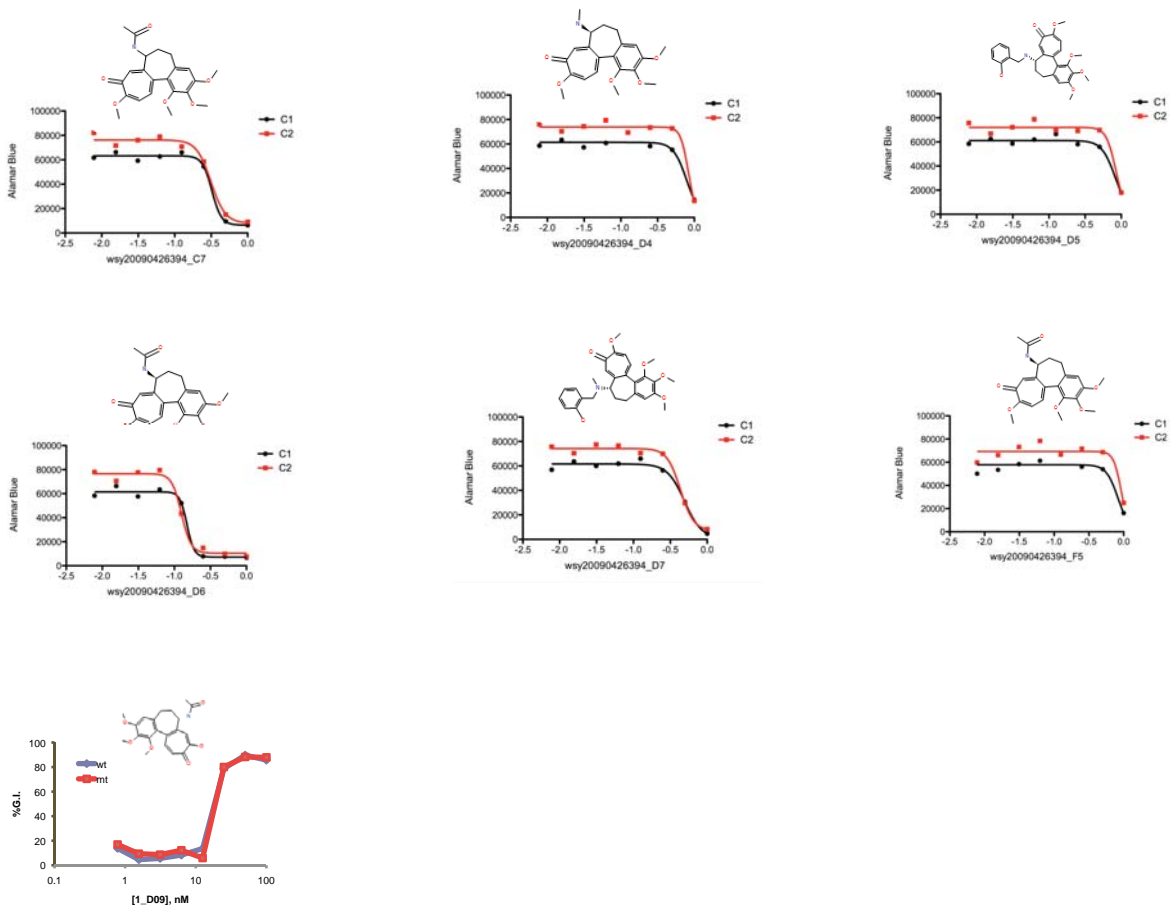

Group 1: Microtubule inhibitor  
Subgroup c. Paclitaxel

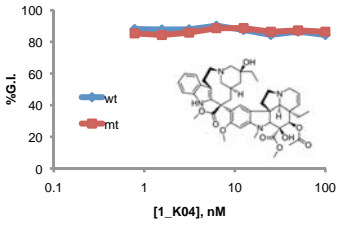

Group 1: Microtubule inhibitor  
Subgroup d. Estradiol-derivatives

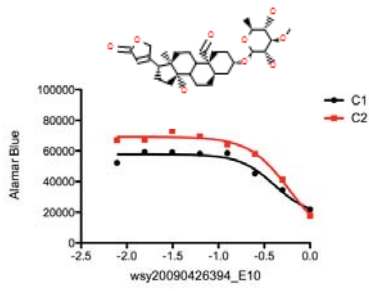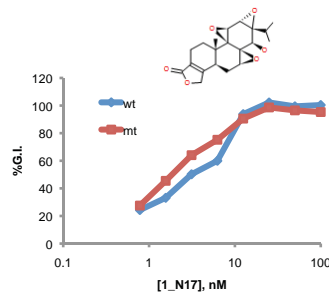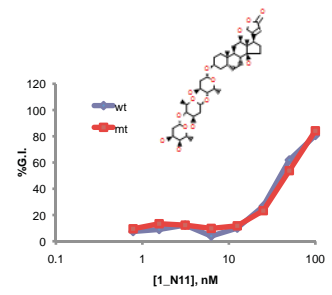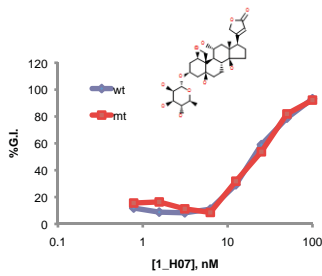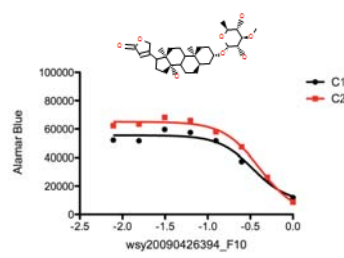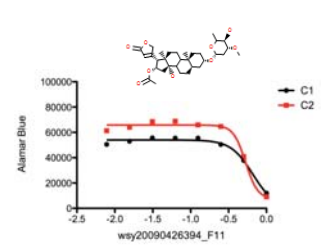

Group 2: Translation inhibitor

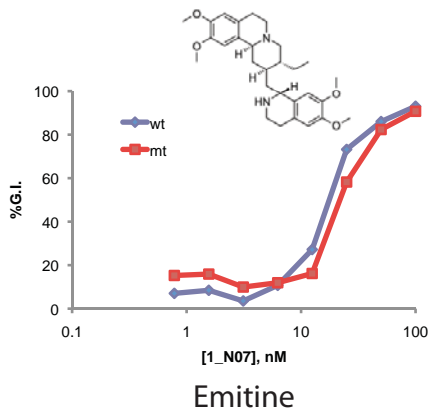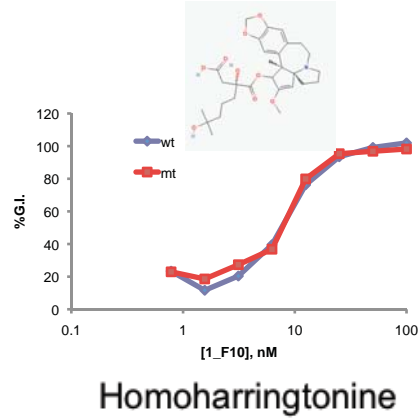

Group 3: Pan-kinase inhibitor

Group 4: Transcription inhibitor

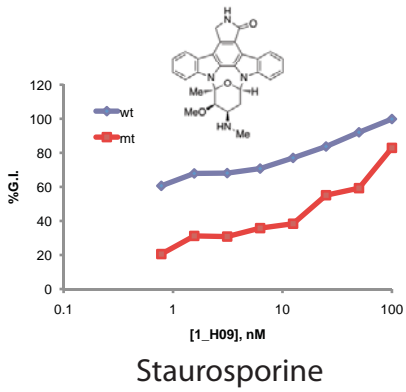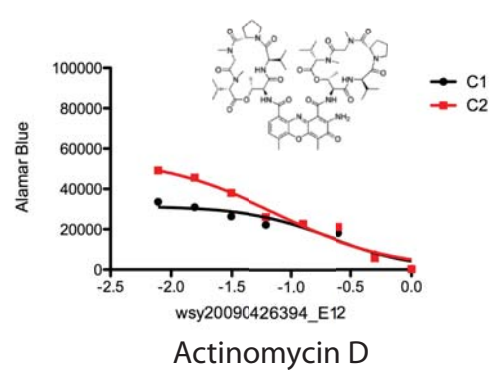

Group 5: Topo II inhibitor

Group 6: Nucleoside analog

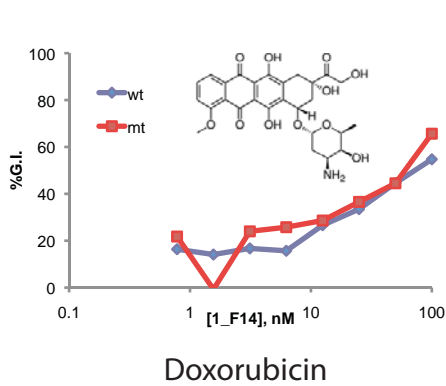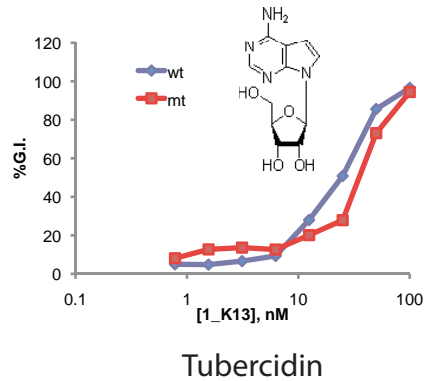



# Unknown Groups:

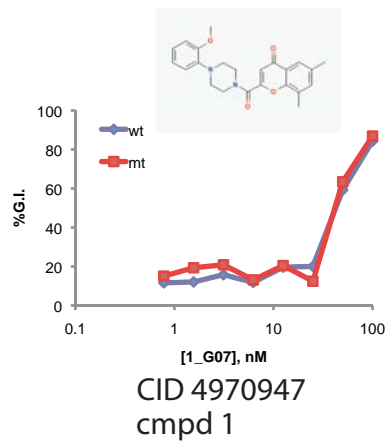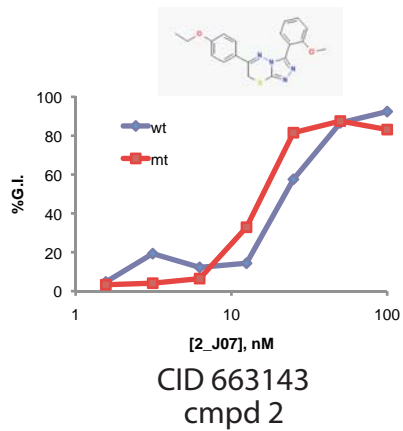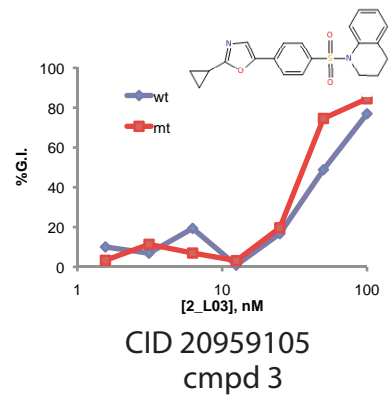

Supporting information Figure S2.

A

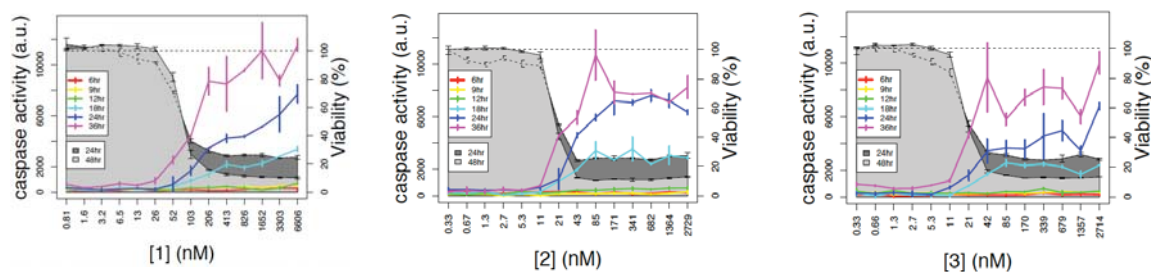

B

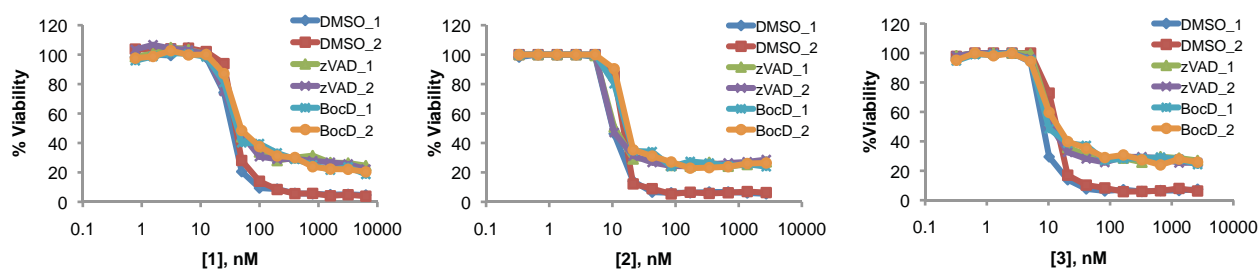

Figure S2. Microtubule inhibition by the identified small molecules activates cellular caspases. However, the activation of caspases partially accounts for cell death induced by microtubule inhibitors as blocking of caspase activation could not rescue cell death completely. (A) Time- and dose-dependent activation of cellular caspases upon compound treatment. (B) HT1080 cells were treated with the indicated compound in the presence or absence of two caspase inhibitors, Boc-D-fmk and zVAD-fmk. The concentration of caspase inhibitors was 50uM and the incubation time was for 24 hours. The cell death was only partially rescued by the caspase inhibitor treatment.

[ Elemental Composition ]

Data : Oct1405

Sample: Compd1

Note : NBA

Inlet : Direct

RT : 1.28 min

Elements : C 28/3, H 100/8, O 4/0, N 2/0

Mass Tolerance : 1000ppm, 1mmu if m/z < 1, 3mmu if m/z > 3

Unsaturation (U.S.) : -0.5 - 100.0

Date : 07-Oct-2011 13:51

Page: 1

SI Fig.S3 page 1

Ion Mode : FAB+

Scan#: (12,16)

| Observed m/z | Int%  | Err[ppm / mmu] | U.S. | Composition       |
|--------------|-------|----------------|------|-------------------|
| 393.1809     | 100.0 | -1.3 / -0.5    | 12.5 | C 23 H 25 O 4 N 2 |

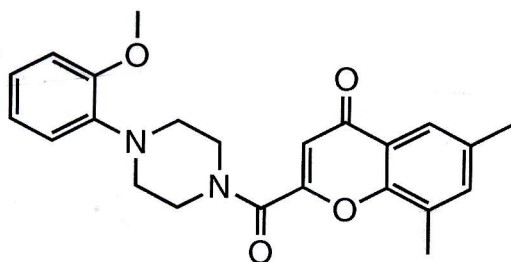

Hi-Res MS of Compound 1

[ Theoretical Ion Distribution ]

Page: 1

Molecular Formula : C23 H25 O4 N2

(m/z 393.1814, MW 393.4625, U.S. 12.5)

SI Fig.S3 page 2

Base Peak : 393.1814, Averaged MW : 393.4639(a), 393.4647(w)

| m/z      | INT.     |       |
|----------|----------|-------|
| 393.1814 | 100.0000 | ***** |
| 394.1847 | 26.8435  | ***** |
| 395.1875 | 4.2611   | **    |
| 396.1902 | 0.4998   |       |
| 397.1928 | 0.0469   |       |
| 398.1954 | 0.0037   |       |
| 399.1980 | 0.0002   |       |

Hi-Res MS of Compound 1

[ Mass Spectrum ]  
Date : 07-Oct-2011 13:48  
Data : Oct1404  
Sample: Compd1  
Note : NBR  
Inlet : Direct Ion Mode : FAB+  
Spectrum Type : Normal Ion [MF-Linear]  
RT : 0.42 min Scan# : (1,10)  
BP : m/z 393.2230 Int. : 17.20  
Output m/z range : 175.6380 to 451.0682 Cut Level : 0.00 %  
1871418

Hi-Res MS of Compound 1

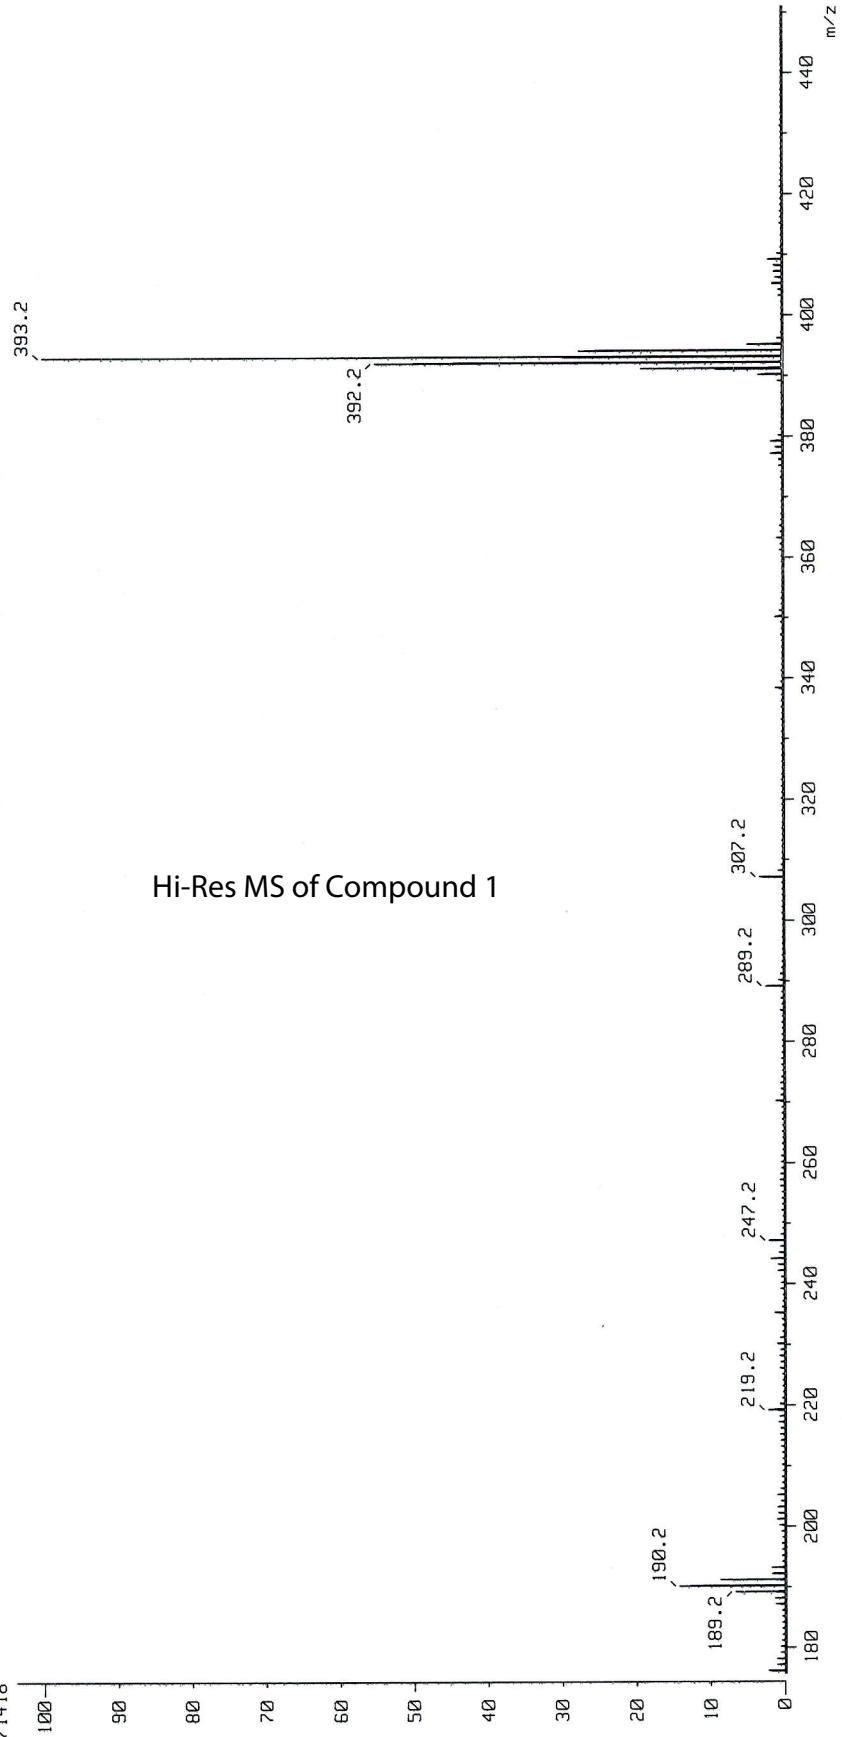

```

NAME                               Compound1
EXPNO                               1
PROCNO                               1
Date_                               20111013
Time                               13.14
INSTRUM                             spect
PROBHD                               5 mm PABBO BB-
PULPROG                             zg30
TD                                   32768
SOLVENT                             CDC13
NS                                   32
DS                                   0
SWH                                  6009.615 Hz
FIDRES                              0.183399 Hz
AQ                                   2.7263477 sec
RG                                   161
DW                                  83.200 usec
DE                                  6.50 usec
TE                                   298.0 K
D1                                   1.00000000 sec
TD0                                  1

===== CHANNEL f1 =====
NUC1                                 1H
P1                                  9.50 usec
PL1                                 -4.00 dB
PL1W                                26.94187927 W
SFO1                                400.1328009 MHz
SI                                   32768
SF                                  400.1300052 MHz
WDW                                  EM
SSB                                  0
LB                                  0.20 Hz
GB                                  0
PC                                  1.00
    
```

Compound1

3.972  
 3.886  
 3.748  
 3.179  
 3.123  
 2.463  
 2.422  
 0.001

7.843  
 7.375  
 7.266  
 7.086  
 7.081  
 7.066  
 7.050  
 7.044  
 6.973  
 6.953  
 6.937  
 6.916  
 6.896  
 6.576

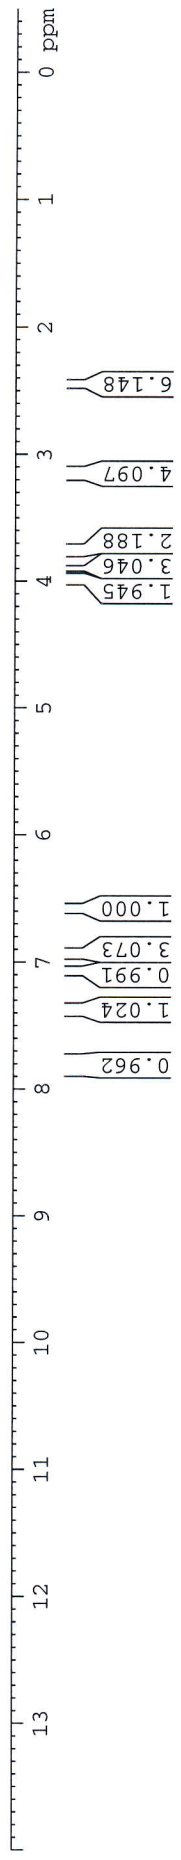

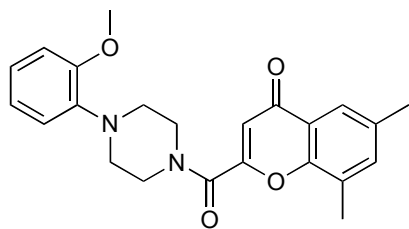

**Compound1**

$^1\text{H}$  NMR ( $\text{CDCl}_3$ , 400MHz, ppm)  $\delta$  7.84(s, 1H), 7.37(s, 1H), 7.06(t,  $J = 8.0\text{Hz}$ , 1H), 6.97-6.89(m, 3H), 6.57(s, 1H), 3.97(b, 2H), 3.88(s, 3H), 3.74(b, 2H), 3.18(b, 2H), 3.12(b, 2H), 2.46(s, 3H), 2.42(s, 3H).

[ Elemental Composition ]

Data : Oct1401

Sample: Compd2

Note : NBA

Inlet : Direct

RT : 0.95 min

Elements : C 25/3, H 100/8, O 2/0, N 4/0, S 1/0

Mass Tolerance : 1000ppm, 1mmu if m/z < 1, 3mmu if m/z > 3

Unsaturation (U.S.) : -0.5 - 100.0

Date : 07-Oct-2011 13:13

Ion Mode : FAB+

Scan#: (7,13)

| Observed m/z | Int%  | Err[ppm / mmu] | U.S. | Composition         |
|--------------|-------|----------------|------|---------------------|
| 367.1227     | 100.0 | -0.4 / -0.2    | 13.5 | C 19 H 19 O 2 N 4 S |

identity of c

analysis

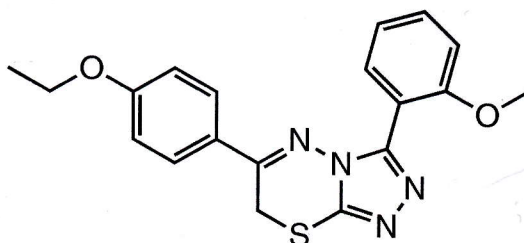

base (Check)

), Cl( ), MALD

Hi-Res MS of Compound 2



[ Theoretical Ion Distribution ]

Page: 1

Molecular Formula : C19 H19 O2 N4 S

SI Fig.S3 page 7

(m/z 367.1229, MW 367.4515, U.S. 13.5)

Base Peak : 367.1229, Averaged MW : 367.4511(a), 367.4523(w)

| m/z      | INT.     |       |
|----------|----------|-------|
| 367.1229 | 100.0000 | ***** |
| 368.1257 | 23.7524  | ***** |
| 369.1227 | 7.5291   | ****  |
| 370.1237 | 1.3074   | *     |
| 371.1247 | 0.1715   |       |
| 372.1260 | 0.0179   |       |
| 373.1275 | 0.0015   |       |
| 374.1293 | 0.0001   |       |

Hi-Res MS of Compound 2

[ Mass Spectrum ]  
Date : 07-Oct-2011 13:10  
Data : Oct1400  
Sample: Compd2  
Note : NBA  
Inlet : Direct Ion Mode : FFB+  
Spectrum Type : Normal Ion [MF-Linear]  
Scan# : (2,8)  
RT : 0.37 min  
BP : m/z 367.1788 Int. : 19.91  
Output m/z range : 163.5312 to 449.5549 Cut Level : 0.00 %  
1537659

### Hi-Res MS of Compound 2

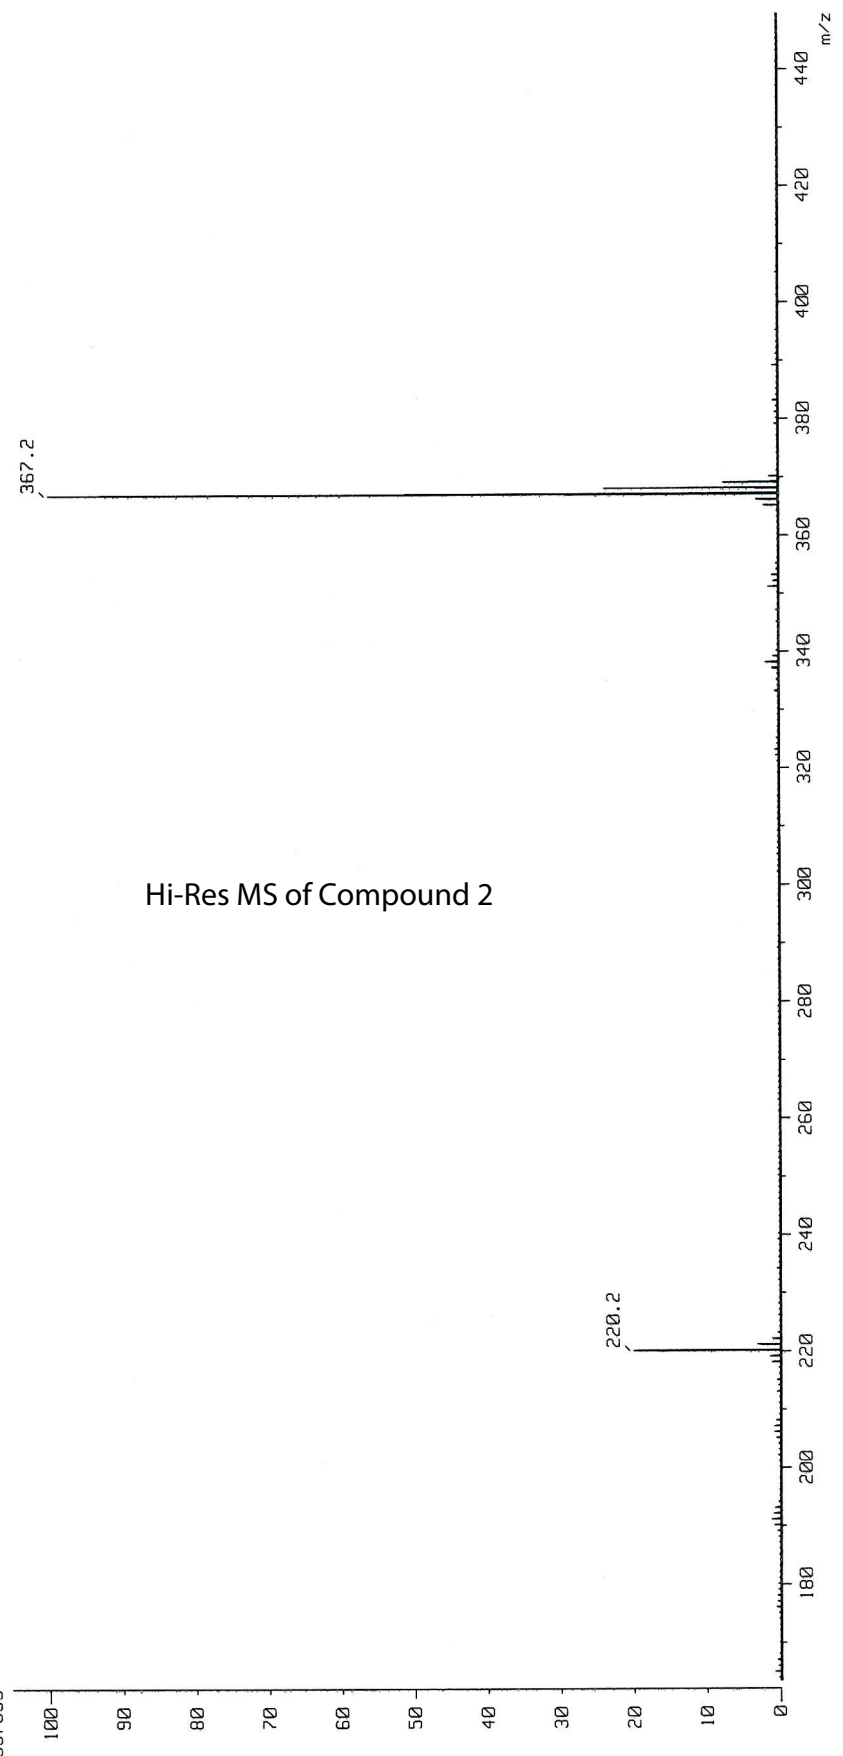

```

NAME Compound2
EXPNO 1
PROCNO 1
Date_ 20111013
Time 13.19
INSTRUM spect
PROBHD 5 mm PABBO BB-
PULPROG zg30
TD 32768
SOLVENT CDCl3
NS 32
DS 0
SWH 6009.615 Hz
FIDRES 0.183399 Hz
AQ 2.7263477 sec
RG 144
DE 83.200 usec
TE 298.0 K
D1 1.0000000 sec
TD0 1
===== CHANNEL f1 =====
NUC1 1H
P1 9.50 usec
PL1 -4.00 dB
PL1W 26.94187927 W
SFO1 400.1328009 MHz
SI 32768
SF 400.1300043 MHz
WDW EM
SSB 0
LB 0.20 Hz
GB 0
PC 1.00

```

Compound2

7.755  
7.732  
7.625  
7.621  
7.606  
7.602  
7.512  
7.508  
7.492  
7.473  
7.469  
7.268  
7.105  
7.086  
7.067  
7.024  
7.003  
6.929  
6.907

4.097  
4.079  
4.062  
4.045  
3.944  
3.736

1.445  
1.428  
1.410

-0.000

SI Fig.S3 page 9

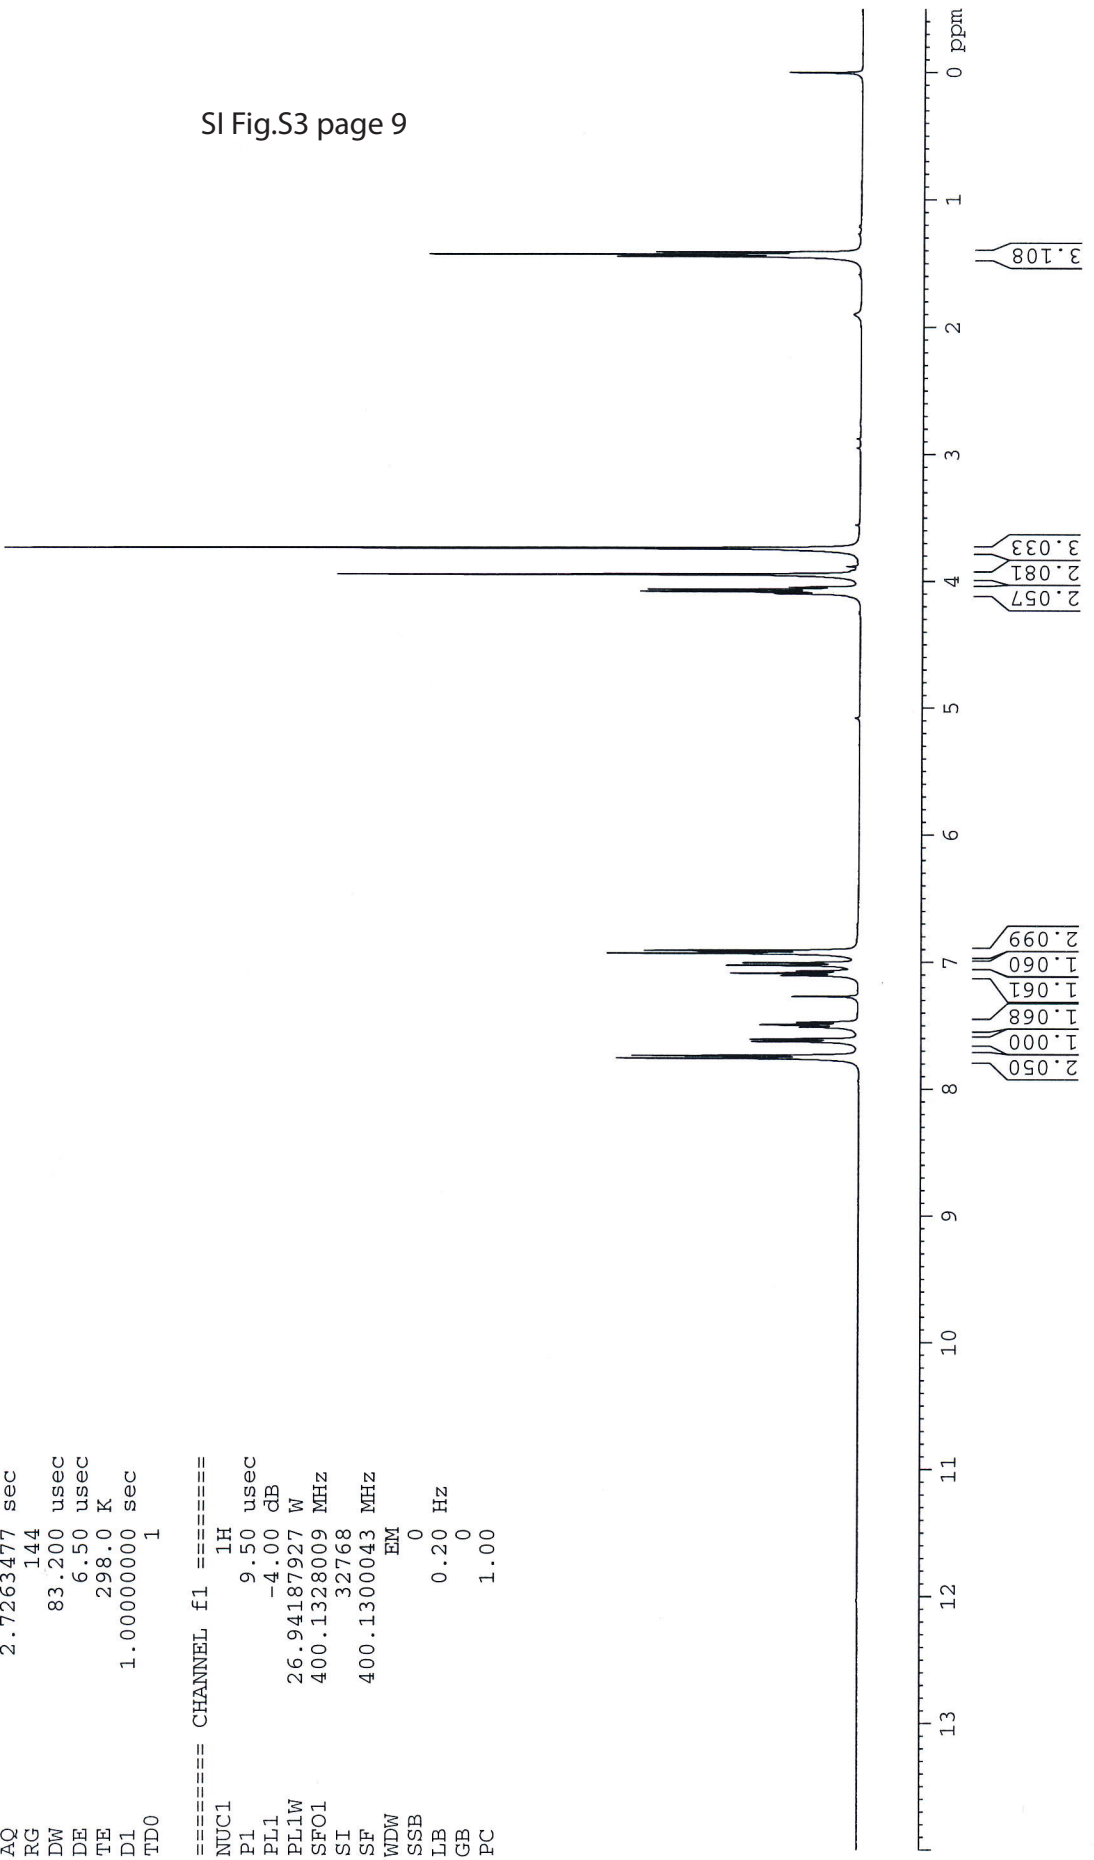

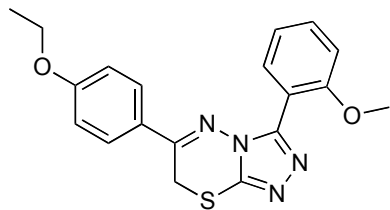**Compound2**

$^1\text{H}$  NMR ( $\text{CDCl}_3$ , 400MHz, ppm)  $\delta$  7.60(d,  $J = 9.2\text{Hz}$ , 2H), 7.51(d,  $J = 7.6\text{Hz}$ , 1H), 7.48(t,  $J = 7.6\text{Hz}$ , 1H), 7.09(t,  $J = 7.6\text{Hz}$ , 1H), 7.01(d,  $J = 8.4\text{Hz}$ , 1H), 6.92(d,  $J = 8.8\text{Hz}$ , 2H), 4.07(q,  $J = 868\text{Hz}$ , 2H), 3.94(s, 2H), 3.74(s, 3H), 1.42(t,  $J = 6.8\text{Hz}$ , 3H).

[ Elemental Composition ]

Data : Oct1403

Sample: Compd3

Note : NBA

Inlet : Direct

RT : 0.74 min

Elements : C 28/3, H 100/8, O 3/0, N 2/0, S 1/0

Mass Tolerance : 1000ppm, 1mmu if m/z < 1, 2mmu if m/z > 2

Unsaturation (U.S.) : -0.5 - 100.0

Date : 07-Oct-2011 13:39

Page: 1

SI Fig.S3 page 11

Ion Mode : FAB+

Scan#: (4,13)

| Observed m/z | Int%  | Err[ppm / mmu] | U.S. | Composition         |
|--------------|-------|----------------|------|---------------------|
| 381.1266     | 100.0 | -1.7 / -0.6    | 13.5 | C 21 H 21 O 3 N 2 S |

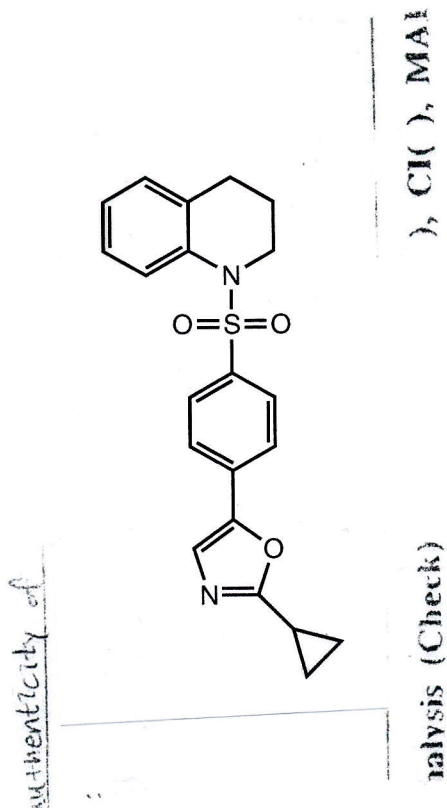

Hi-Res MS of Compound 3

[ Theoretical Ion Distribution ]

Molecular Formula : C21 H21 O3 N2 S

(m/z 381.1273, MW 381.4753, U.S. 13.5)

Base Peak : 381.1273, Averaged MW : 381.4750(a), 381.4762(w)

| m/z      | INT.     |       |
|----------|----------|-------|
| 381.1273 | 100.0000 | ***** |
| 382.1304 | 25.3102  | ***** |
| 383.1276 | 8.1007   | ***** |
| 384.1288 | 1.4756   | *     |
| 385.1299 | 0.2078   |       |
| 386.1313 | 0.0235   |       |
| 387.1330 | 0.0022   |       |
| 388.1347 | 0.0002   |       |

Hi-Res MS of Compound 3

[ Mass Spectrum ]  
Date : 07-Oct-2011 13:34  
Data : Oct1402  
Sample: Compd23  
Note : NBR  
Inlet : Direct Ion Mode : FAB+  
Spectrum Type : Normal Ion [MF-Linear]  
RT : 0.37 min Scan# : (1,9)  
BP : m/z 381.1656 Int. : 17.03  
Output m/z range : 192.7893 to 423.3234 Cut Level : 0.00 %  
1672289

Hi-Res MS of Compound 3

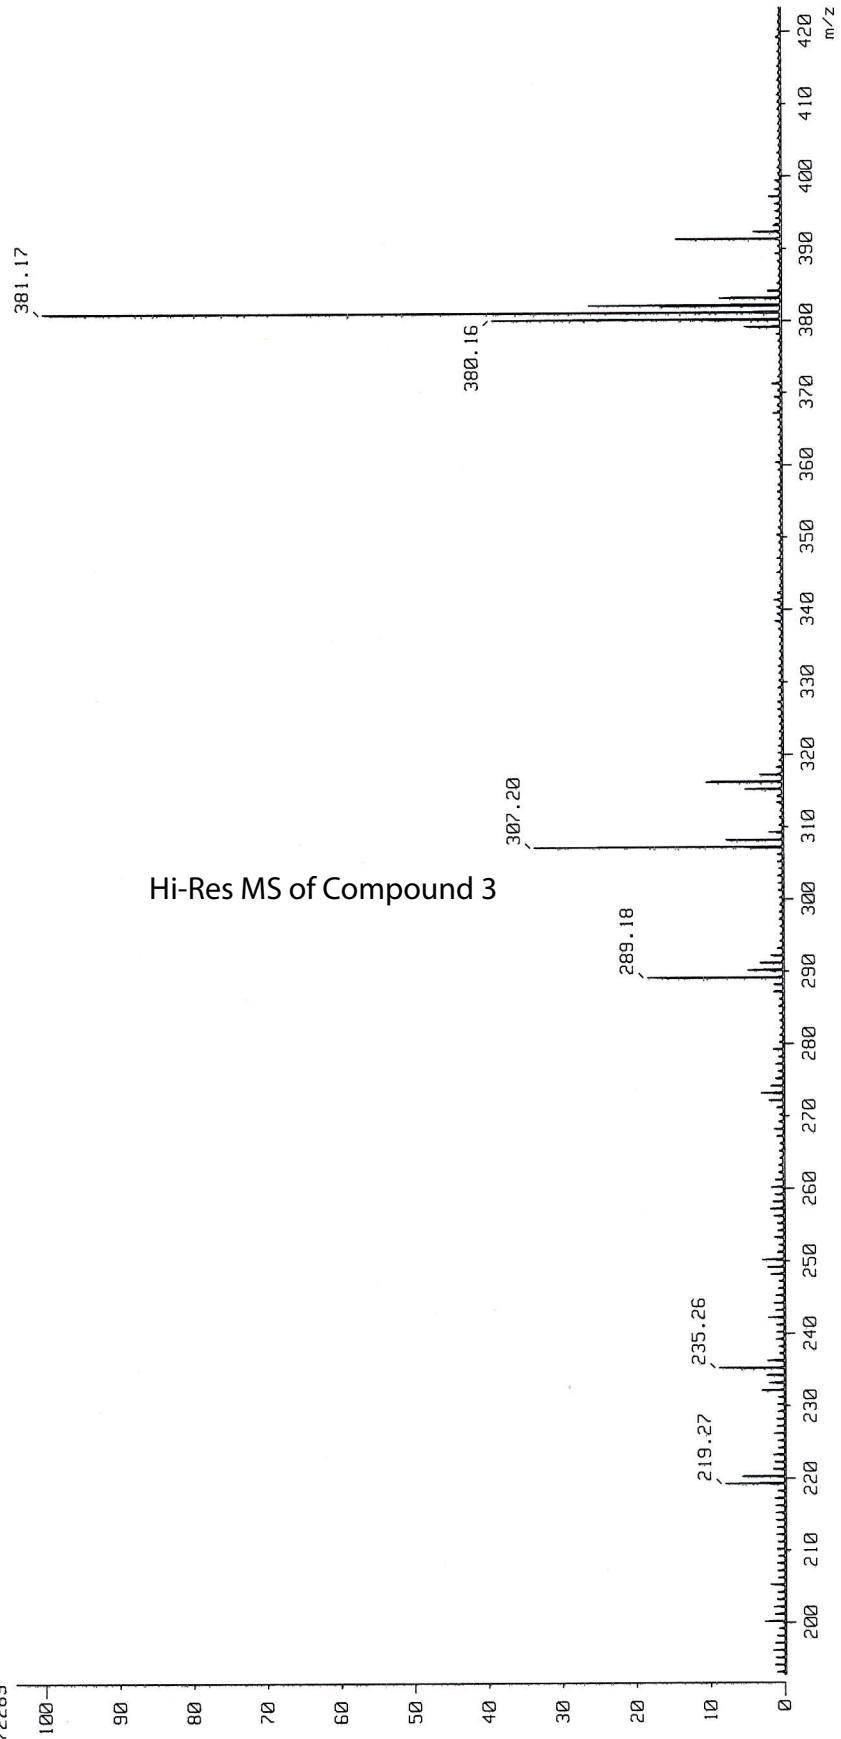

Compound 3

NAME  
 EXNO 1  
 PROCNO 1  
 Date\_ 20111012  
 Time 18.30  
 INSTRUM spect  
 PROBDH 5 mm PABBO BB-  
 PULPROG zg30  
 TD 32768  
 SOLVENT CDCl3  
 NS 126  
 DS 0  
 SWH 6009.615 Hz  
 FIDRES 0.183399 Hz  
 AQ 2.7263477 sec  
 RG 456  
 DW 83.200 usec  
 DE 6.50 usec  
 TE 298.0 K  
 D1 1.0000000 sec  
 TD0 1

==== CHANNEL f1 =====  
 NUC1 1H  
 P1 9.50 usec  
 PL1 -4.00 dB  
 PL1W 26.94187927 W  
 SFO1 400.1328009 MHz  
 SI 32768  
 SF 400.1300073 MHz  
 WDW EM  
 SSB 0  
 LB 0.20 Hz  
 GB 0  
 PC 1.00

Compound 3

3.840  
 3.825  
 3.810  
 2.455  
 2.438  
 2.421  
 2.152  
 2.139  
 2.131  
 2.119  
 2.106  
 2.099  
 2.086  
 1.684  
 1.668  
 1.653  
 1.637  
 1.621  
 1.138  
 1.133  
 1.126  
 1.121  
 1.117  
 1.101

7.816  
 7.795  
 7.581  
 7.562  
 7.556  
 7.274  
 7.261  
 7.224  
 7.205  
 7.187  
 7.109  
 7.090  
 7.072  
 7.014  
 6.995

SI Fig.S3 page 14

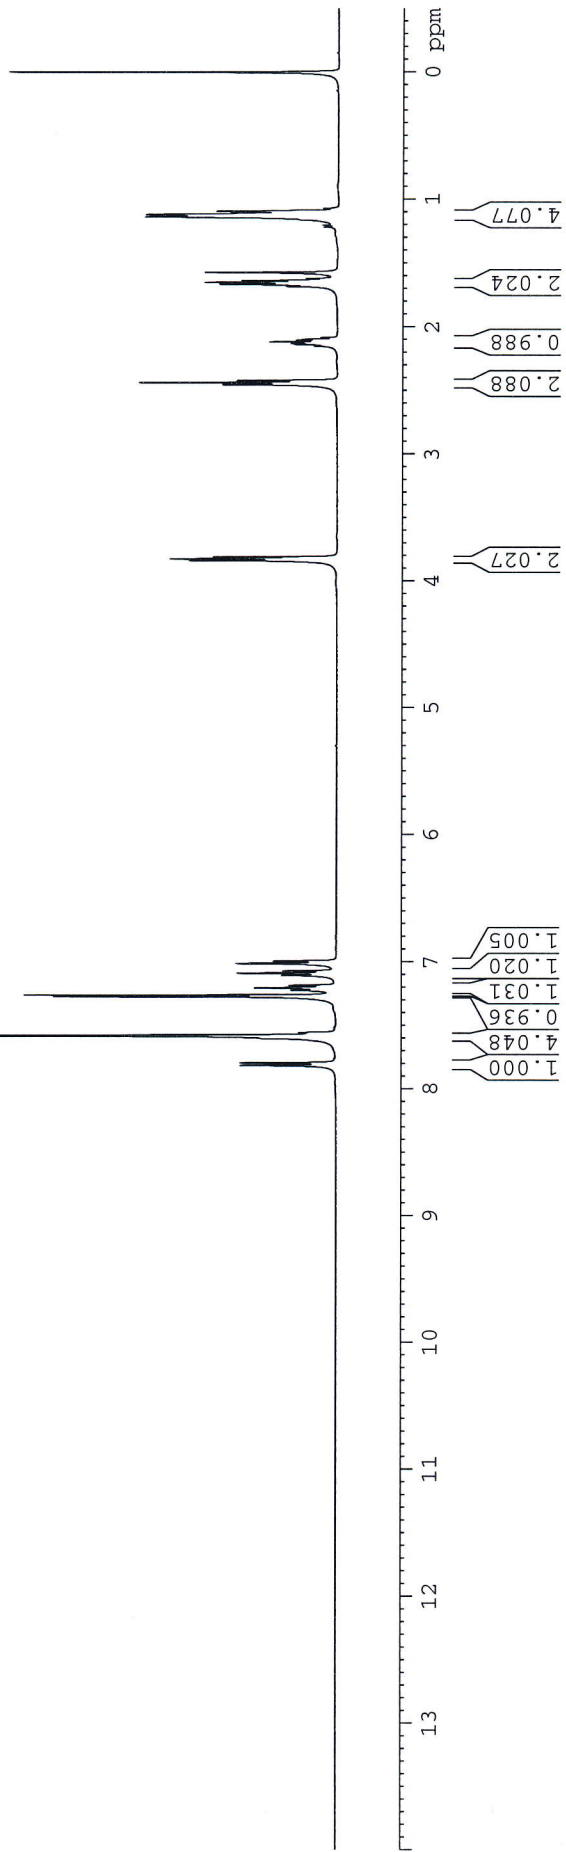



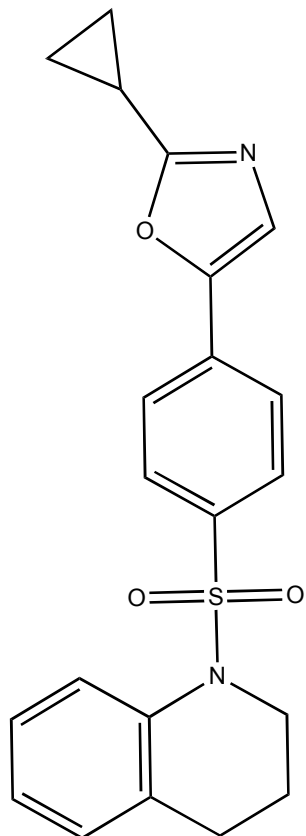**Compound 3** !

!

$^1\text{H}$  NMR ( $\text{CDCl}_3$ , 400MHz, ppm)  $\delta$  7.80(d,  $J = 7.6\text{Hz}$ , 1H), 7.58-7.55(m, 4H), 7.27(s, 1H), 7.20(t,  $J = 7.6\text{Hz}$ , 1H), 7.09(t,  $J = 7.6\text{Hz}$ , 1H), 7.00(d,  $J = 7.6\text{Hz}$ , 1H), 3.82(t,  $J = 6.0\text{Hz}$ , 2H), 2.43(t,  $J = 6.8\text{Hz}$ , 2H), 2.11(m, 1H), 1.65(q,  $J = 6.4\text{Hz}$ , 2H), 1.13-1.09(m, 4H)

Supplementary information Table S1. List of cell death modulators use in Fig.3.

| Abbreviation           | Chemical or Genetic Modulator                                | Mechanism                                              | Concentration used |
|------------------------|--------------------------------------------------------------|--------------------------------------------------------|--------------------|
| DFOM                   | Deferoxamine                                                 | Chelates iron                                          | 100uM              |
| Co2+                   | Cobalt (II)                                                  | Blocks calcium channels                                | 656uM              |
| ALLN                   | Calpain Inhibitor I                                          | Inhibitor of calpain I and II, cathepsins B,L          | 7.5uM              |
| Lmim                   | L-mimosine                                                   | Inhibits G1-S cell cycle transition                    | 200uM              |
| p53 <sup>KD</sup>      | Knock down of Tumor protein 53                               | Initiates apoptosis in response to DNA damage          | -                  |
| CHX                    | Cycloheximide                                                | Protein synthesis inhibitor                            | 1.5uM              |
| Dig                    | Digoxin                                                      | Na <sup>+</sup> /K <sup>+</sup> ATPase inhibitor       | 0.13uM             |
| zVAD                   | Cbz-val-ala-asp(OMe)-fluormethylketone                       | Broad spectrum caspase inhibitor                       | 50uM               |
| aTOC                   | a-tocopherol                                                 | Antioxidant                                            | 100uM              |
| U0126                  | 1,4-diamino-2,3-dicyano-1,4-bis[2-aminophenylthio] butadiene | Mek 1/2 inhibitor                                      | 10uM               |
| 3MA                    | 3-methyladenine                                              | Inhibitor of autophagosome formation                   | 5mM                |
| ATA                    | Aurintricarboxylic Acid                                      | Nuclease inhibitor                                     | 38uM               |
| NAD <sup>+</sup>       | Nicotinamide adenine dinucleotide                            | Activates sirtuins, prevents energetic depletion       | 2mM                |
| ActD                   | Actinomycin D                                                | RNA synthesis inhibitor                                | 0.016uM            |
| BocD                   | t-butoxycarbonyl-asp-fluormethylketone                       | Broad spectrum caspase inhibitor                       | 50uM               |
| Bcl2 <sup>OE</sup>     | Overexpression of B-cell leukemia/lymphoma 2                 | Prevents mitochondrial outer membrane permeabilization | -                  |
| Nec1                   | Necrostatin-1                                                | Inhibitor of necroptosis                               | 19.5uM             |
| Survivin <sup>OE</sup> | Overexpression of Survivin                                   | Inhibits caspases                                      |                    |
| BHA                    | Butylated hydroxyanisole                                     | Antioxidant                                            | 50uM               |
| BHT                    | Butylated hydroxytoluene                                     | Antioxidant                                            | 50uM               |
| DPQ                    | 3,4-dihydro-5-[4-(1-piperidiny)butoxy]-1(2H)-isoquinolinone  | Inhibitor of PARP1                                     | 10uM               |
| CspA                   | Cyclosporin A                                                | Binds cyclophilin                                      | 5uM                |

**Cell lines**

HT-1080 cells were grown in DEME supplemented with 10% fetal bovine serum and non-essential amino acids. BJeLR cells were maintained in 4:1 mixture of DMEM to M199 supplemented with 15% heat-inactivated fetal bovine serum. MCF10A cells were maintained in the culture media described previously<sup>1</sup>. Penicillin and streptomycin were used as antibiotics in all media. Cells were incubated in a tissue culture incubator at 37°C in a humidified incubator containing 5% CO<sub>2</sub>.

**Dose curve generation (Figure 1)**

Compound plates were prepared by diluting compound stock solution (in DMSO) to the cell growth media and by making 2-fold dilution series on the 384-well microplates as 10x concentrated solution. Assay plates were prepared by seeding 1000 cells per well in 36 µl of growth media in black, clearbottom, 384-well plates. Cells were treated with compound by transferring 4µL solution from the compound plates to the assay plates. One day later, alamar blue (Invitrogen, Carlsbad, CA, USA, catalog number DAL1100) was added to the assay plates in order to determine cell viability. All liquid handling was carried out using a Biomek FX AP384 module (Beckman Coulter, Fullerton, CA, USA). Percent growth inhibition (%GI) was calculated from the following formula using alamar blue readout:

$$\%GI = 100 \times (1 - (X - N)/(P - N))$$

where X is values from cells with compound treatment, N is the values from media, and P is the values from cells and DMSO. All experiments were performed in triplicate.

**Immunohistochemistry (Figure 2A)**

Cells were grown on coverslips to ~50% confluency and treated with indicated amount of MTIs for 4 hours. Cells were fixed with 3.7% formaldehyde solution in PBS for 15-30min followed by washing with PBS 5 times. Cell membrane was permeabilized with 0.2% Triton-X in PBS for 10min and rinsed once with TBS (10mM Tris [pH 7.5], 150mM NaCl). The permeabilized sample was blocked with 10% goat serum in TTBS (0.1% Tween-20 in TBS) for 30-60min and washed once with TTBS. The microtubule network was probed with anti-tubulin antibody (Santa Cruz cat# sc-32293) in 1% goat serum in TTBS for 30-60min at room temperature followed by washing in TTBS for 10min. Alexa Fluor anti-mouse antibody (Invitrogen, cat#A-11005) was used as the secondary antibody to visualize the microtubule network using the 60x lens of an epifluorescence microscope.

**Modulatory profiling (Figure 3)**

HT-1080 cells were trypsinized, counted, and combined with modulators or with vehicle and seeded into 384-well plates at 1000 cells/well. Various MTIs were dissolved in DMSO and arrayed in 14-point dilution series in a 384-well polypropylene plate (Greiner, cat. #781280) and stored at -80°C. The plate was diluted 1:25 into cell culture media in polypropylene plates, then 1:10 into the assay plates approximately one hour after cells were seeded. After 48 hours, a 50%

Alamar blue solution was added to a final concentration of 10% Alamar blue. After 16 hours of incubation, the fluorescence intensity was determined using a Victor 3 plate reader (Perkin Elmer) with a 535 nm excitation filter and a 590 nm emission filter. All assays were done in at least triplicate.

To generate a heat map shown in Figure 3, we created dose response curve of MTIs with or without the modulator and calculated differences in AUC (area under the curve).

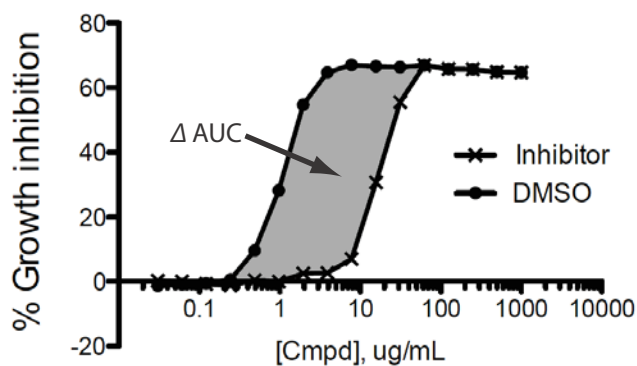

$$\text{Normalized AUC} = \frac{\Delta \text{AUC}}{\text{AUC}_{\text{DMSO}}} = \frac{\text{AUC}_{\text{DMSO}} - \text{AUC}_{\text{Inh}}}{\text{AUC}_{\text{DMSO}}}$$

For example, the graph shown above contains two dose-response curves from two conditions; one from lethal compound with DMSO and the other from lethal compound with a cell death inhibitor. AUC (Area Under the Curve) of each curve was calculated and  $\Delta \text{AUC}$  was determined by subtracting  $\text{AUC}_{\text{Inh}}$  from  $\text{AUC}_{\text{DMSO}}$ . The normalized AUC was determined by dividing  $\Delta \text{AUC}$  by  $\text{AUC}_{\text{DMSO}}$  and was used to create the heatmap shown in Fig. 3.

1. Debnath, J.; Muthuswamy, S. K.; Brugge, J. S., Morphogenesis and oncogenesis of MCF-10A mammary epithelial acini grown in three-dimensional basement membrane cultures. *Methods* **2003**, *30* (3), 256-68.
